1 Full title: **First evidence of SARS-CoV-2 genome detection in zebra mussel (*Dreissena***  
2 ***polymorpha*).**

3  
4 Antoine LE GUERNIC <sup>1\*</sup>, Mélissa PALOS LADEIRO<sup>1</sup>, Nicolas BOUDAUD<sup>2</sup>, Julie DO  
5 NASCIMENTO<sup>1</sup>, Christophe GANTZER<sup>3#</sup>, Jean-Christophe INGLARD<sup>4</sup>, Jean-Marie  
6 MOUCHEL<sup>5#</sup>, Cécile POCHE<sup>4</sup>, Laurent MOULIN<sup>6#</sup>, Vincent ROCHER<sup>7</sup>, Prunelle WALDMAN<sup>5</sup>,  
7 Sébastien WURTZER<sup>6#</sup>, Alain GEFFARD<sup>1</sup>.

8  
9 1: Université de Reims Champagne-Ardenne, UMR-I02 SEBIO, Moulin de la Housse BP1039,  
10 51687 Reims, France.

11 2: Food Safety Department, Actalia, Saint-Lô, F-50000, France

12 3: Université de Lorraine, LCPME, Laboratoire de Chimie Physique et Microbiologie pour  
13 l'Environnement, UMR 7564, Institut Jean Barriol, Faculté des Sciences et Technologies,  
14 Vandœuvre-lès-Nancy F-54506, France

15 4: Grand Reims Communauté Urbaine, Direction de l'eau et de l'assainissement, CS 80036 –  
16 51722 Reims Cedex

17 5: Sorbonne Université, CNRS, EPHE, UMR 7619 Metis, E-LTER Zone Atelier Seine, Paris,  
18 F-75005, France

19 6: Eau de Paris. Direction de la Recherche, du Développement et de la Qualité de l'Eau, 94200  
20 Ivry-sur-Seine, France.

21 7: Syndicat Interdépartemental pour l'Assainissement de l'Agglomération Parisienne (SIAAP),  
22 Direction de l'Innovation, 82 avenue Kléber, Colombes, 92700, France

23

24 #: Member of the Obepine's steering committee

25 \* Corresponding author: [antoine.le-guernic@univ-reims.fr](mailto:antoine.le-guernic@univ-reims.fr)

26

27 **Abstract**

28 The uses of bivalve molluscs in environmental biomonitoring have recently gained momentum  
29 due to their ability to indicate and concentrate human pathogenic microorganisms. In the  
30 context of the health crisis caused by the COVID-19 epidemic, the objective of this study was  
31 to determine if the SARS-CoV-2 ribonucleic acid genome can be detected in zebra mussels  
32 (*Dreissena polymorpha*) exposed to raw and treated urban wastewaters from two separate  
33 plants to support its interest as bioindicator of the SARS-CoV-2 genome contamination in  
34 water. The zebra mussels were exposed to treated wastewater through caging at the outlet of  
35 two plants located in France, as well as to raw wastewater at laboratory scale in controlled  
36 conditions. Within their digestive tissues, our results showed that SARS-CoV-2 genome was  
37 detected in zebra mussels, whether in raw and treated wastewaters. Moreover, the detection  
38 of the SARS-CoV-2 genome in such bivalve molluscans appeared even with low  
39 concentrations in raw wastewaters. This is the first detection of the SARS-CoV-2 genome in  
40 the tissues of a sentinel species exposed to raw and treated urban wastewaters. Despite the  
41 need for development for quantitative approaches, these results support the importance of  
42 such invertebrate organisms, especially zebra mussel, for the active surveillance of pathogenic  
43 microorganisms and their indicators in environmental waters.

44

45

46 **Keywords:** Bivalve; COVID-19; RT-qPCR; wastewater.

47

48 **Graphical abstract**

49

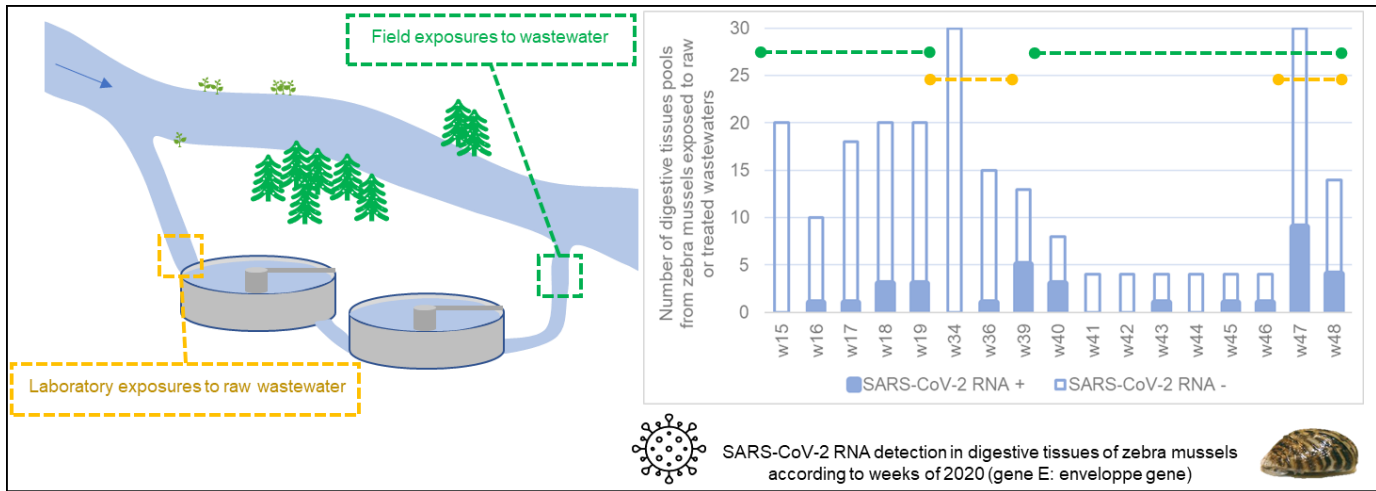

## 64 1. Introduction

65 Since several months, the world has been facing a historic viral pandemic. This pandemic was  
66 formalized by the World Health Organization (WHO) on March 11, 2020 and has a known  
67 origin in the Wuhan region in China (Langone et al., 2021; WHO, 2020a). Since then, this  
68 disease has spread around the world, causing many victims, and disrupting daily life. This  
69 pandemic (COVID-19) is caused by SARS-CoV-2, a coronavirus. The *Coronaviridae* includes  
70 seven virus species that infect humans, among them SARS-CoV and MERS-CoV, which  
71 appeared in the 2000s, and therefore SARS-CoV-2, discovered in December 2019 (Lu et al.,  
72 2020; Yang et al., 2020). In France, human contaminations were focused on two waves of  
73 contamination, from early March 2020 to mid-May 2020 and from mid-October 2020 to the end  
74 of 2020.

75 This virus is mainly transmitted by direct contact with an infected person or indirectly via  
76 infected droplets (Langone et al., 2021). These droplets are found in the air or on surfaces  
77 whose nature greatly varies the lifespan of the virus (Ren et al., 2020). However, since the  
78 SARS-COV-2 can infect and replicate both gastrointestinal glandular epithelial cells and  
79 respiratory system, the faecal-oral contamination cannot be excluded (Amirian, 2020; Heller et  
80 al., 2020; Peng et al., 2020). The occurrence of SARS-CoV-2 genome in the faeces is about  
81 43% of COVID-19 patients and can longer be detected in digestive tract than in the respiratory  
82 one (Amirian, 2020; Kitajima et al., 2020; Zhang et al., 2021). This virus can therefore reach  
83 wastewater via sewages from cities and hospitals. The presence of SARS-CoV-2 genome has  
84 been detected in many raw wastewaters worldwide, especially during intense epidemiological  
85 phases (Balboa et al., 2020; Guerrero-Latorre et al., 2020; Kitajima et al., 2020; Nemudryi et  
86 al., 2020; Randazzo et al., 2020; Rimoldi et al., 2020; Wang et al., 2020; Wurtzer et al., 2020a).  
87 The treatments carried out in wastewater treatment plants (WWTPs) seem inactivate infectious  
88 SARS-CoV-2 since numerous studies attesting to its presence in the raw wastewater no longer  
89 observe it after biological treatments performed by some WWTPs (Balboa et al., 2020;  
90 Randazzo et al., 2020; Rimoldi et al., 2020; Singer and Wray, 2020). Nevertheless, some

91 studies have detected SARS-CoV-2 genomes in treated wastewaters at wastewater treatment  
92 plants in France and Germany (Westhaus et al., 2021; Wurtzer et al., 2020b). This virus can  
93 also be detected in rivers in many developing countries, with rudimentary or in the absence of  
94 water treatment systems (Guerrero-Latorre et al., 2020), but also in developed countries (Polo  
95 et al., 2021; Rimoldi et al., 2020). However, there is still little knowledge concerning the survival  
96 of infectious SARS-CoV-2 in this aquatic environment. At a laboratory scale, Desdouts et al.  
97 (2021) demonstrated the accumulation of inactivated SARS-CoV-2 genome in different  
98 shellfish tissues of oysters (*Crassostrea gigas*). Wurtzer et al. (2021) have shown the presence  
99 of numerous forms of SARS-Cov-2 genomes in wastewaters including a small part of infectious  
100 and encapsidated particles using RT-qPCR and infectivity assays. Traces of SARS-CoV-2  
101 genome were assessed in digestive tissues of *Ruditapes philippinarum* and *R. decussatus*  
102 taken from several coastal sites in Spain (Polo et al., 2021).

103 For several years, the use of sentinel species (i.e. bivalve molluscs) of the microbiological  
104 contamination of the environmental waters has intensified. The detection for many pathogens  
105 in filter-feeding and sessile organisms have many advantages and can complement the direct  
106 analyses of water matrices. Bivalve molluscs can indicate bacterial, protozoan or even viral  
107 contamination (Bighiu et al., 2019; Capizzi-Banas et al., 2021; Kerambrun et al., 2016; La Rosa  
108 et al., 2021). The high filtration capacity of bivalves allows them to filter large volumes of water  
109 (Palos Ladeiro et al., 2018; Polo et al., 2021). These invertebrate organisms can therefore be  
110 exposed to a panel of contaminants potentially more representative of their environment than  
111 that found in a water sample. Indeed, Bighiu et al. (2019) pointed to bacterial indicators 132  
112 times higher in zebra mussels than in wastewater. Correlatively, the hepatitis A virus was  
113 detected in 16% of bivalve samples (*Mytilus galloprovincialis*, *Solen vagina*, *Venus gallina*, and  
114 *Donax trunculus*) against 9% in all water samples (La Rosa et al., 2021). This has also been  
115 demonstrated in zebra mussels for the Low Pathogenic Avian Influenza virus, but to a lesser  
116 extent (Stumpf et al., 2010). This filtration capacity is supplemented by an interesting  
117 bioaccumulation kinetics since the filter-feeding bivalves rapidly accumulate biological  
118 pollutants while being able to keep them several days (or even weeks) after the pressure in

119 the environment has disappeared (Bighiu et al., 2019; Capizzi-Banas et al., 2021; Stumpf et  
120 al., 2010). This allows to have an integrative approach of water contamination over time. Also,  
121 the possibility to perform active biomonitoring through the caging allows a temporal and spatial  
122 assessment of the contamination, comparing different geographical sites or hydrosystems  
123 (Capizzi-Banas et al., 2021). Among indicator species, the zebra mussel, *Dreissena*  
124 *polymorpha*, has many advantages for biomonitoring programs under biological pressure  
125 (Kraak et al., 1991; Palos Ladeiro et al., 2014). This species is quite resistant to environmental  
126 pressures, is easy to handle and can be used in laboratory studies or in the field through the  
127 caging technique (Bervoets et al., 2005; Capizzi-Banas et al., 2021; Géba et al., 2020;  
128 Kerambrun et al., 2016; Le Guernic et al., 2020; Palos Ladeiro et al., 2018). The digestive  
129 tissues of bivalve molluscs is generally used to detect the presence of enteric viruses,  
130 especially enteroviruses, since it is the main site of contamination within the bivalve maybe  
131 due to specific receptors (Fuentes et al., 2014; Le Guyader et al., 2006; Lees and TAG, 2010;  
132 Suffredini et al., 2020). Desdouits et al. (2021) have reported accumulation of inactivated  
133 SARS-CoV-2 genome in digestive, mantle and gill tissues of oysters (*Crassostrea gigas*). This  
134 highlighted the potential interest of using digestive tissues of *D. polymorpha* for detecting  
135 SARS-CoV-2 genome in environmental waters.

136 In this context, the objectives of this study were: i) to know if SARS-CoV-2 genomes can be  
137 detected in zebra mussels at the inlet and / or at the outlet of two French wastewater treatment  
138 plants (WWTPs), namely Reims and center Seine (Ile-de-France public sanitation service,  
139 SIAAP), and ii), to determine if this organism can be used as a bioindicator of water  
140 contamination by this virus in field and laboratory exposures. These objectives are tested  
141 during the two waves of contamination observed in France.

142

## 143 **2. Materials and methods**

### 144 *2.1. Zebra mussels*

145 Zebra mussels ( $2.98 \pm 0.38$  g;  $2.51 \pm 0.19$  cm) were collected during October and November  
146 of 2019 from Der lake (51290 Giffaumont-Champaubert, France, N  $48^{\circ}33'35''$ ; E  $4^{\circ}45'11''$ ) and  
147 brought back to the laboratory, where they were maintained in 1,000 L aerated tanks with 750  
148 L of municipal drinking water ( $13.46 \pm 1.77^{\circ}\text{C}$ ; pH  $8.15 \pm 0.17$ ;  $597 \pm 27$  mS/cm;  $0.21 \pm 0.05$   
149 mg/L nitrites;  $58.05 \pm 13.54$  mg/L nitrates;  $0.14 \pm 0.42$  mg/L ammoniac). Mussels were kept  
150 several months before the experiments, under these acclimation conditions. Throughout this  
151 acclimation step, mussels were fed *ad libitum*, twice per week, with *Nannochloropsis* (Nanno  
152 3600, Planktovie, Marseille, France).

153

## 154 2.2. Reims and SIAAP WWTPs

155 The Reims WWTP is located at 16 chemin des Temples, 51370 Saint-Thierry ( $49^{\circ}16'49.566''$   
156 N,  $3^{\circ}59'32.625''$  E) and is managed by Grand Reims. The center Seine WWTP is located 5  
157 Boulevard Louis Seguin, 92700 Colombes ( $48^{\circ}55'57.936''$  N,  $2^{\circ}14'38.58''$  E) and is managed  
158 by the SIAAP. Their characteristics are summarized in Annex 1. Briefly, the two treatment  
159 plants have common characteristics, namely physical and chemical treatment of wastewater  
160 and sludge, as well as biological treatment of wastewater. The biological treatment of the two  
161 WWTPs is mechanical (anaerobic and aeration tanks, biofilters, etc.) and does not include a  
162 step with chlorine. At the end of the water treatment process, this water is discharged into the  
163 Vesle for the Reims WWTP, and into the Seine for that of the SIAAP.

164

## 165 2.3. Experimental designs

### 166 2.3.1. *In situ* exposures to treated wastewaters

167 Two exposures to effluent were performed on dates corresponding to the two epidemiological  
168 waves observed in France. The first one was performed from 07<sup>th</sup> April 2020 to 07<sup>th</sup> May 2020,  
169 while the second one was performed from 25<sup>th</sup> September 2020 to 27<sup>th</sup> November 2020. These  
170 cages were deposited into the 1,000 L acclimation tanks. Polyethylene cages, having a volume

171 of 931 cm<sup>3</sup>, and exhibiting 5 x 5 mm mesh, contained 150 mussels, and were then deposited  
172 by two at the study sites. For the site of Reims, cages were placed on the sediment with a  
173 water column height of at least 40 cm above them and were connected to the bank with a  
174 cable, while for the center Seine site, cages were placed inside the WWTP in a tank receiving  
175 treated wastewaters.

176 For the earlier experiment (April and May 2020), mussels were caged at the exit of the Reims  
177 WWTP (49°16'39.5" N, 3°59'06.5" E) and inside that of center Seine (48°55'57.936" N,  
178 2°14'38.58" E). Caging and sampling kinetics are described in Table 1. The digestive glands  
179 of three zebra mussels were grouped together to have enough biological material for the  
180 analyses. At each sampling time, ten pools of three digestive glands are recovered for Reims  
181 WWTP, and five pools of three digestive glands for SIAAP WWTP. The samples were then  
182 directly frozen by liquid nitrogen vapours and then stored at -80°C before the analyses.  
183 Concerning the experiment conducted in October and November 2020, mussels were only  
184 exposed to the exit of Reims WWTP. As previously described, dissections were performed at  
185 laboratory and pools of digestive glands were then stocked at -80°C until RT-qPCR.

186 For each different caging periods, less than 10% mortality was reported.

187

188 *Table 1: Caging and sampling kinetics for exposures to treated wastewaters.*

| Experiment  | Locations         | Start             | Sampling times                                                | End              |
|-------------|-------------------|-------------------|---------------------------------------------------------------|------------------|
| Spring 2020 | Reims WWTP        | 07th April        | D0 / D1 / D3 / D7 /<br>D14 / D21 / D28                        | 05th May         |
|             | Center Seine WWTP | 16th April        | D4 / D7 / D11 / D14 /<br>D18 / D21                            | 07th May         |
| Autumn 2020 | Reims WWTP        | 25th<br>September | D3 / D7 / D14 / D21 /<br>D28 / D35 / D41 /<br>D49 / D56 / D63 | 27th<br>November |

189

### 190 2.3.2. Laboratory exposures to raw wastewater

191 Four laboratory experiments were performed on dates corresponding to the second  
192 epidemiological wave observed in France. The first one was performed from 18<sup>th</sup> August to  
193 22<sup>nd</sup> August 2020, the second from 02<sup>sd</sup> September to 05<sup>th</sup> September 2020, the third exposure



194 was realised from 24<sup>th</sup> September to 27<sup>th</sup> September 2020, while the fourth one was performed  
195 on one week from 16<sup>th</sup> November 2020 to 23<sup>rd</sup> November 2020.

196 The experimental procedure is identical for all four experiments, as described below. Before  
197 the experiments, mussels were placed in 10 L aerated glass tanks in the dark with control of  
198 the temperature at 13°C. Four tanks containing each 30 *D. polymorpha*, were implemented: i)  
199 with 100% (4 L) of Cristaline Aurele drinking water (spring Jandun, France); ii) 10% of raw  
200 wastewater coming from the WWTP of Reims and collected the day before (drinking water q.s.  
201 4 L); ii) 33% of raw wastewater (drinking water q.s. 4 L); and iv) 100% of raw wastewater.  
202 These waters were changed every day, and the input of raw wastewater came, each  
203 experiment day, from a sample the day before. Concerning the first exposure (August 2020),  
204 samples were collected on D1, D2, D3 and D4. For both September exposures, samples were  
205 collected only on D3, and mussels were not fed during the experimentation step, while  
206 concerning the last exposure (November 2020), that lasted longer (sampling time on D1 and  
207 D7), mussels were fed every day with Nanno 3600 algae (Planktovie, Marseille, France) before  
208 the water change. For this last exposure, two tanks containing 30 zebra mussels were placed  
209 for the 100% raw wastewater condition. As previously described, dissections were performed  
210 at laboratory and pools of digestive glands were then stocked at -80°C before RT-qPCR  
211 analysis. During the exposures carried out at the end of September and in November, mussels  
212 in 100% and 33% raw sewage conditions could be dissected respectively before D3 and D7  
213 according to their general condition (in particular the time required to close the valves). For  
214 these experiments, 15 pools of 3 mussels were dissected before D3 (September) or D7  
215 (November) because of the toxicity of untreated wastewater, undiluted or two-thirds diluted.

216

#### 217 *2.4. SARS-CoV-2 genome detection in wastewater*

218 Analyses of SARS-CoV-2 genome in raw wastewater were realised by the Obepine group  
219 (Réseau Obepine, 2021). Briefly, virus particles were concentrated by ultracentrifugation of 11  
220 mL of wastewater sample and RNA genome were extracted according to Wurtzer et al.

221 (2020a). SARS-CoV-2 genes RdRp (RNA-dependent RNA polymerase), E (envelope protein)  
222 and N (nucleocapsid protein) were assessed and quantified by RT-qPCR according to Pasteur  
223 Institute protocol (WHO, 2020b), Corman et al. (2020) and CDC protocol (U.S. Department of  
224 Health and Human Services, 2020) respectively (Table 2). Then these data were synthesized  
225 into an indicator obtained by data assimilation with a digital model of the Kalman filter type  
226 (Forward-Backward). This graph was constructed only with envelop protein gene. Data for the  
227 Reims and center Seine (SIAAP) WWTPs were collected from April 2020 to January 2021, and  
228 compared to periods of confinement and curfew observed in France (Réseau Obepine, 2021).  
229 This information is available on the Obepine network site (Réseau Obepine, 2021).

230

## 231 2.5. SARS-COV-2 GENOME detection in digestive tissues of *D. polymorpha*

### 232 2.5.1. RNA quantification

233 After thawing of samples, 200  $\mu$ L of proteinase K for 200 mg of digestive tissues was added  
234 (3 U/ml, Euromedex, Souffelweyersheim, France). Samples were then homogenized several  
235 seconds with an ultra-turrax (Ika-Werk, Janke & Kunkel, Staufen im Breisgau, Germany).  
236 Then, cells were lysed by adding trizol reagent and the whole was vortexed (Molecular  
237 Research Center Inc., OH, USA). Chloroform (VWR) was added and vortexed 30 seconds with  
238 samples and then incubated 15 minutes at room temperature. The aqueous phase containing  
239 the nucleic material was recovered after centrifugation (12,000 g, 15 min, 4°C). The following  
240 steps of RNA extraction were realised using the PureLink™ RNA mini kit (Invitrogen,  
241 ThermoFisher Scientific, MA, USA) following the manufacturer recommendations, until  
242 recovering RNA in RNase free water. RNA samples were frozen (-20°C) until reverse  
243 transcription polymerase chain reaction.

244

### 245 2.5.2. Reverse transcription polymerase chain reaction and RNA detection

246 SARS-CoV-2 RNA detection was based on works of Corman et al. (2020), and performed with  
 247 SuperScript™ III one-step RT-PCR with platinum™ Taq (Invitrogen). Genes tested in this  
 248 article were: RdRp: RNA-dependent RNA polymerase gene; E, an envelope protein gene and  
 249 N, nucleocapsid protein gene. Primers and probes used come from the study of Corman et al.  
 250 (2020), were provided by Eurogentec (Liege, Belgium) and are described below (Table 2  
 251 2). Unlike water samples, the viral load within the digestive gland mash cannot be  
 252 pre-concentrated. Characteristics of RT-qPCR were: 10 min at 55°C (RT) / 3 min at 95°C / 50  
 253 cycles of 15 sec at 95°C / 30 sec at 58°C (CFX96 Touch Real-Time PCR System, BioRad, CA,  
 254 USA). NTC controls were realised by adding molecular-grade water, positive controls were  
 255 performed by adding SARS-CoV-2 positive control (COV019 batch number 20033001, Exact  
 256 Diagnostics, TX, USA) before RT-qPCR, and extraction controls were performed by adding 10  
 257 µL of this positive standard to digestive gland pools from mussels not exposed (between  
 258 dissection and freezing). This positive extraction control allowed the obtention of an extraction  
 259 yield between initial and final concentration of 70% for the E and N genes, and of 28% for the  
 260 RdRp gene. The positive detections of the SARS-CoV-2 genome in the digestive tissues of  
 261 zebra mussels were validated by a second passage of these samples in reverse transcription  
 262 polymerase chain reaction.

263

264 *Table 2 : List and characteristics of primers (F and R) and probes (P) used for Rt-qPCR analyses. From Corman et*  
 265 *al. (2020). E: envelope protein gene; RdRp: RNA-dependent RNA polymerase gene; N or N1 (in wastewater):*  
 266 *nucleocapsid protein gene.*

| Medium  | Gene | Oligonucleotide  | Sequence                           | Final concentration |
|---------|------|------------------|------------------------------------|---------------------|
| Mussels | RdRp | RdRp_SARSr-F     | GTG-ARA-TGG-TCA-TGT-GTG-GCG-G      | 600 nM              |
|         |      | RdRp_SARSr-R     | CAR-ATG-TTA-AAS-ACA-CTA-TTA-GCA-TA | 800 nM              |
|         |      | RdRp_SARSr-P2    | CAG-GTG-GAA-CCT-CAT-CAG-GAG-ATG-C  | 100 nM              |
|         | E    | E_Sarbeco_F      | ACA-GGT-ACG-TTA-ATA-GTT-AAT-AGC-GT | 400 nM              |
|         |      | E_Sarbeco_R      | ATA-TTG-CAG-CAG-TAC-GCA-CAC-A      | 400 nM              |
|         |      | E_Sarbeco_P1     | ACA-CTA-GCC-ATC-CTT-ACT-GCG-CTT-CG | 200 nM              |
|         | N    | N_Sarbeco_F      | CAC-ATT-GGC-ACC-CGC-AAT-C          | 600 nM              |
|         |      | N_Sarbeco_R      | GAG-GAA-CGA-GAA-GAG-GCT-TG         | 800 nM              |
|         |      | N_Sarbeco_P      | ACT-TCC-TCA-AGG-AAC-AAC-ATT-GCC-A  | 200 nM              |
| Water   | RdRp | nCoV_IP4-14059Fw | GGT-AAC-TGG-TAT-GAT-TTC-G          | 400 nM              |
|         |      | nCoV_IP4-14146Rv | CTG-GTC-AAG-GTT-AAT-ATA-GG         | 400 nM              |
|         |      | nCoV_IP4-14084P  | TCA-TAC-AAA-CCA-CGC-CAG-G          | 200 nM              |
|         | N1   | 2019-nCoV_N1-F   | GAC-CCC-AAA-ATC-AGC-GAA-AT         | 400 nM              |
|         |      | 2019-nCoV_N1-R   | TCT-GGT-TAC-TGC-CAG-TTG-AAT-CTG    | 400 nM              |
|         |      | 2019-nCoV_N1-P   | ACC-CCG-CAT-TAC-GTT-TGG-TGG-ACC    | 200 nM              |

267

268

### 269 3. Results and discussion

#### 270 3.1. Detection of SARS-CoV-2 genomes in raw wastewaters

271 Obepine group has performed the wastewater analyses on the two WWTPs studied, and  
272 summarized Figure 1A (Réseau Obepine, 2021). Table 3 contains the concentrations of the  
273 three targeted SARS-CoV-2 genes in raw wastewaters. These data were averaged over the  
274 week for caging exposure to treated wastewater, or over the duration of exposure during  
275 laboratory exposures to raw wastewater. The contamination profiles of untreated wastewater  
276 by SARS-CoV-2 from Reims and the center Seine WWTPs in 2020 were remarkably similar,  
277 and wastewater from both sites exhibited concentrations of comparable values (Table 3).  
278 During the first exposures of zebra mussels to treated wastewater (spring), water  
279 contamination by the SARS-CoV-2 genome was very high (almost 500,000 copies/L for E  
280 gene), but dropped considerably until it reached its lowest values at the end of these exposures  
281 (Figure 1A or <DL, Table 3). On the other hand, the exposures to treated wastewater carried  
282 out at the end of 2020 corresponded to a period when the index was quite high (between 50  
283 and 150, *Figure 1*). During this second caging exposure, genome concentrations of SARS-  
284 CoV-2 in raw water remained stable (between 38,000 and 91,000 copies/L for E gene, Table  
285 3). This range of values was also found within exposures carried out in the laboratory after half  
286 of September 2020. Indeed, a notable increase in concentrations between the two experiments  
287 carried out in September 2020 was observed (Table 3).

288

289 *Table 3 : Concentrations (gene copies/L) of the SARS-CoV-2 genome in raw wastewater from WWTPs in Reims*  
290 *and center Seine, averaged over the week or over the duration of exposure. The concentrations under the various*  
291 *dilution conditions are estimates. Data are expressed as mean  $\pm$  standard deviation (SD). The concentration*  
292 *estimate for the dilution conditions were obtained with respect to the 100% condition. E: envelope protein gene;*

293 *RdRp*: RNA-dependent RNA polymerase gene; *N1*: nucleocapsid protein gene; *NA*: not analysed; *DL*: detection  
 294 limit.

| Experiment                                                 | Condition / Week        | RNA concentration in raw wastewater<br>(average over the week or over the duration of the experiment) |   |       |                          |   |        |                           |   |        |
|------------------------------------------------------------|-------------------------|-------------------------------------------------------------------------------------------------------|---|-------|--------------------------|---|--------|---------------------------|---|--------|
|                                                            |                         | <i>RdRp</i> gene (copies/L)                                                                           |   |       | <i>E</i> gene (copies/L) |   |        | <i>N1</i> gene (copies/L) |   |        |
|                                                            |                         | Mean                                                                                                  | ± | SD    | Mean                     | ± | SD     | Mean                      | ± | SD     |
| Spring caging<br>(April-May 2020)                          | Reims WWTP (W15)        | NA                                                                                                    | ± | NA    | 489525                   | ± | 411855 | NA                        | ± | NA     |
|                                                            | Reims WWTP (W16)        | NA                                                                                                    | ± | NA    | 464844                   | ± | 426420 | NA                        | ± | NA     |
|                                                            | Reims WWTP (W17)        | NA                                                                                                    | ± | NA    | 21891                    | ± | 17883  | NA                        | ± | NA     |
|                                                            | Reims WWTP (W18)        | 398                                                                                                   | ± | 406   | < DL                     | ± | < DL   | NA                        | ± | NA     |
|                                                            | Reims WWTP (W19)        | 390                                                                                                   | ± | 202   | 20634                    | ± |        | NA                        | ± | NA     |
|                                                            | center Seine WWTP (W16) | NA                                                                                                    | ± | NA    | 223704                   | ± | 16364  | NA                        | ± | NA     |
|                                                            | center Seine WWTP (W17) | NA                                                                                                    | ± | NA    | NA                       | ± | NA     | NA                        | ± | NA     |
|                                                            | center Seine WWTP (W18) | NA                                                                                                    | ± | NA    | 44178                    | ± |        | NA                        | ± | NA     |
|                                                            | center Seine WWTP (W19) | NA                                                                                                    | ± | NA    | 2045                     | ± |        | NA                        | ± | NA     |
| Autumn caging<br>(September-<br>October-<br>November 2020) | Reims WWTP (W39)        | 39276                                                                                                 | ± | 23004 | 80507                    | ± | 39936  | 141385                    | ± | 189176 |
|                                                            | Reims WWTP (W40)        | 14983                                                                                                 | ± | 12229 | 71795                    | ± | 50457  | 31469                     | ± | 19527  |
|                                                            | Reims WWTP (W41)        | 12110                                                                                                 | ± | 6586  | 77802                    | ± | 55418  | 32343                     | ± | 15197  |
|                                                            | Reims WWTP (W42)        | 5110                                                                                                  | ± | 2640  | 37909                    | ± | 22827  | 19212                     | ± | 15800  |
|                                                            | Reims WWTP (W43)        | 8169                                                                                                  | ± | 5701  | 41674                    | ± | 19787  | 21552                     | ± | 7286   |
|                                                            | Reims WWTP (W44)        | 11287                                                                                                 | ± | 2161  | 59840                    | ± | 19573  | 36114                     | ± | 21821  |
|                                                            | Reims WWTP (W45)        | 12417                                                                                                 | ± | 8961  | 73853                    | ± | 29035  | 42215                     | ± | 16489  |
|                                                            | Reims WWTP (W46)        | 8388                                                                                                  | ± | 2969  | 40722                    | ± | 18186  | 46769                     | ± | 39254  |
|                                                            | Reims WWTP (W47)        | 9156                                                                                                  | ± | 3901  | 79050                    | ± | 78280  | 27520                     | ± | 19756  |
|                                                            | Reims WWTP (W48)        | 3814                                                                                                  | ± | 4826  | 91106                    | ± | 124838 | 15137                     | ± | 11540  |
| 1st laboratory<br>exposure (August<br>2020)                | 100 % raw wastewater    | 6173                                                                                                  | ± | 2942  | 21400                    | ± | 12297  | 24157                     | ± | 25522  |
|                                                            | 33 % raw wastewater     | 2037                                                                                                  | ± | 971   | 7062                     | ± | 4058   | 7972                      | ± | 8422   |
|                                                            | 10 % raw wastewater     | 617                                                                                                   | ± | 294   | 2140                     | ± | 1230   | 2416                      | ± | 2552   |
| 2nd laboratory<br>exposure<br>(September 2020)             | 100 % raw wastewater    | 4244                                                                                                  | ± | 421   | 17237                    | ± | 8801   | 30611                     | ± | 18872  |
|                                                            | 33 % raw wastewater     | 1401                                                                                                  | ± | 139   | 5688                     | ± | 2904   | 10102                     | ± | 6228   |
|                                                            | 10 % raw wastewater     | 424                                                                                                   | ± | 42    | 1724                     | ± | 880    | 3061                      | ± | 1887   |
| 3rd laboratory<br>exposure<br>(September 2020)             | 100 % raw wastewater    | 32230                                                                                                 | ± | 19355 | 73026                    | ± | 41874  | 57763                     | ± | 33155  |
|                                                            | 33 % raw wastewater     | 10636                                                                                                 | ± | 6387  | 24098                    | ± | 13818  | 19062                     | ± | 10941  |
|                                                            | 10 % raw wastewater     | 3223                                                                                                  | ± | 1935  | 7303                     | ± | 4187   | 5776                      | ± | 3316   |
| 4th laboratory<br>exposure<br>(November 2020)              | 100 % raw wastewater    | 9913                                                                                                  | ± | 4086  | 113242                   | ± | 120853 | 26232                     | ± | 18650  |
|                                                            | 33 % raw wastewater     | 3271                                                                                                  | ± | 1348  | 37370                    | ± | 39882  | 8657                      | ± | 6154   |
|                                                            | 10 % raw wastewater     | 991                                                                                                   | ± | 409   | 11324                    | ± | 12085  | 2623                      | ± | 1865   |

295

296 *3.2. Detection of SARS-CoV-2 genome in digestive tissues of zebra mussels exposed to*  
 297 *treated wastewaters*

298 The number of pools of digestive tissues from mussels caged in potentially contaminated  
 299 wastewater as well as the number of pools with detection of the SARS-CoV-2 genome (at least  
 300 one of the three genes tested) are shown on Figure 1B and on Figure 2A. Table 4 described  
 301 the detections of the SARS-CoV-2 genome in zebra mussel samples.

302 The first objective of our study was whether the SARS-CoV-2 genome could be detected by  
 303 the zebra mussel caged at the exit of the WWTP. RNA of SARS-CoV-2 was found in digestive  
 304 glands of mussels caged at the exit of both center Seine and Reims WWTPs (Table 4, Figure  
 305 2A). These detections covered, for each season, the entire exposure period (from April 14 to

306 May 07, 2020 during spring caging, and from September 18 to November 20, 2020 during  
307 autumn caging, Table 4). Since the concentration values of the various SARS-CoV-2 genes  
308 were obtained in raw wastewater, the connection with their detection in caged mussels  
309 exposed to treated wastewater must be considered with caution. During the first caging  
310 campaign, corresponding to a decreasing phase of the raw wastewater index (Figure 1A), 10%  
311 of the exposed mussel pools showed positivity to the SARS-CoV-2 genomes in their digestive  
312 tissues (Figure 2A). Surprisingly, when only the results from the center Seine WWTP were  
313 considered, this percentage raised to 21%, compared to 5% at the outlet of Reims WWTP. In  
314 Reims, the two positive samples were reported in week 16, corresponding to very high  
315 concentrations of viral genomes in raw wastewater (464,844 copies of E gene per liter), but  
316 also in week 18, during which however the concentrations in the wastewater were below the  
317 detection limit (Table 3). For the center Seine WWTP, even with less data, the same  
318 observation was made, namely that the detection of SARS-CoV-2 genome in mussels mainly  
319 occurred during weeks 18 and 19 when the concentrations found in the raw wastewater were  
320 much lower (44,178 and 2,045 copies of E gene per liter respectively, Table 3). The detection  
321 of the SARS-CoV-2 genomes in digestive tissues of zebra mussels was therefore possible  
322 even with small amount present in the aquatic environment, and this detection lasted several  
323 days.

324 The second experiment was performed when the concentration of the SARS-CoV-2 genome  
325 in raw wastewater increased until a plateau (Figure 1A), and showed 18% of positivity to the  
326 virus genome in mussels (only for the Reims WWTP, Figure 2A). Looking more closely,  
327 genome positivity for SARS-CoV-2 in mussels was mainly observed during weeks when the  
328 concentration in the water was quite high (about 70,000 copies of E gene per liter, weeks 40,  
329 45, 47, especially for the E gene, Table 3).

330 Several other studies have assessed the presence of SARS-CoV-2 genomes upstream and  
331 downstream of WWTPs. Most of them observed presence of the viral genomes in raw  
332 wastewater from urban WWTP (Balboa et al., 2020; Randazzo et al., 2020; Rimoldi et al.,  
333 2020). All these studies have reported the absence of SARS-CoV-2 genome in treated

334 wastewaters after secondary ± tertiary treatments. Wurtzer et al. (2020b) and Westhaus et al.  
335 (2021) have nonetheless detected SARS-CoV-2 genomes after WWTP in France and  
336 Germany, respectively. Correlatively, Guerrero-Latorre et al. (2020) and Rimoldi et al. (2020)  
337 have reported presence of SARS-CoV-2 genome in rivers not linked to water treatment plant.  
338 There are therefore still gray areas as to the fate of this virus within hydrosystems.  
339 Among the three genes used to detect SARS-CoV-2 genome, only the envelope (E) and of the  
340 nucleocapsid (N) genes were detected in mussels (Table 4). Even with maximum  
341 concentration of the samples, no detection of the RNA-dependent RNA polymerase (RdRp)  
342 gene was reported, contrary to N gene detected only with the maximum concentration (Table  
343 4). The same conclusion can be made with regard to the concentrations of the three SARS-  
344 CoV-2 genes in untreated wastewater. In fact, the concentrations for the E gene were  
345 approximately 6 times higher than those of the RdRp gene and 2 times higher than those of  
346 the N gene (Table 3). These differences may be due to the various PCR efficiencies for these  
347 genes but also to the non-homogeneous fragmentation of viral genomes inside our biological  
348 matrix (Wurtzer et al., 2021). These discrepancies had already been revealed by other studies,  
349 for analyses of the SARS-CoV-2 genome in wastewater or in sludges. Several genes can be  
350 targeted by RT-qPCR to study the presence of the SARS-CoV-2 genome, based on the genes  
351 of envelope, nucleocapsid, ORF1ab, or even the RNA-dependent RNA polymerase (Kitajima  
352 et al., 2020). However, to date, there is no harmonization of procedures or standardization of  
353 the detection of SARS-CoV-2 genome and variations of results according to these assays were  
354 reported (Farkas et al., 2020). Corman et al. (2020) reported that the RdRp gene had a lower  
355 detection limit than the N and E genes. However, other studies observed different results,  
356 synthesized by Nalla et al. (2020). These authors have tested seven RT-qPCR assays linked  
357 to SARS-CoV-2 and concluded that N2 set and E gene are the most sensitive (Kitajima et al.,  
358 2020; Nalla et al., 2020), while Shirato et al. (2020) reported that only the RT-qPCR assays  
359 carried on the nucleocapsid gene worked for them. Rimoldi et al. (2020) evaluated the  
360 presence of 3 genes of the SARS-CoV-2 (Orf1ab, N, E) in different aquatic environments  
361 (WWTPs and rivers). Only one of the sites showed positivity to the SARS-CoV-2 genome with



362 all 3 genes detected, and this is the only site where the E and N genes were both detected.  
363 Desdouits et al. (2021) used Corman's E set for the envelope gene and IP4 set for RdRp gene,  
364 and these two genes were expressed in tissues lysates of *Crassostrea gigas* after controlled  
365 exposure to heat-inactivated SARS-CoV-2. In our study, the viral genome positivity of the  
366 digestive gland samples was mainly linked to the E gene, and a few of these samples also had  
367 positivity via the N gene (Table 4). Despite the lack of harmonization on the methods used, it  
368 would have been interesting to use other specific genes of SARS-CoV-2 (Orf1ab, RdRp IP4  
369 set, other regions of N or E genes, etc.) to potentially improve its detection within digestive  
370 glands of zebra mussels.

371 Few studies had reported detection of SARS-CoV-2 genome in treated wastewaters. In our  
372 study, detection of the SARS-CoV-2 genome in the digestive glands of zebra mussels exposed  
373 at the WWTP outlet was observed. The use of a filter feeder and sessile species could explain  
374 this difference. The detection of SARS-CoV-2 genomes directly in wastewater was often  
375 represented by a value at a time point as well as on a volume of water which is not fully  
376 representative of the water mass. Correlatively, zebra mussels, because of their sessility and  
377 their filtration capacity, allow a more extensive characterization of the pollution of their  
378 environment (Kraak et al., 1991; Palos Ladeiro et al., 2014). In fact, these organisms can  
379 bioaccumulate biological and chemical pollutants for several days or even weeks, allowing  
380 pollution to be monitored over time, and filter a significant volume of water that is better  
381 representative of the mass of water (Bervoets et al., 2005; Palos Ladeiro et al., 2018; Wiesner  
382 et al., 2001). Concerning the SARS-CoV-2 genome, oysters have already proven their  
383 effectiveness by accumulating this virus during laboratory exposures (Desdouits et al., 2021).

384 Also in the marine environment, the *Ruditapes* genus had shown its efficiency in accumulating  
385 the SARS-CoV-2 genome in their digestive tissues (Polo et al., 2021). The authors of this study  
386 concluded that mollusc bivalves can be used as biomonitoring tools for various anthropogenic  
387 contaminants, including the SARS-CoV-2 virus. During our study, zebra mussels were useful  
388 to detect SARS-CoV-2 genome in both untreated and treated wastewaters, even if the  
389 concentrations in wastewater was under the detection limit (1,000 copies/L). All these



390 characteristics make such bivalve, and particularly zebra mussels, good indicators for the  
391 detection of SARS-CoV-2 genomes in such environments. These organisms can potentially  
392 support or even improve the sensitivity of the direct detection of the viral genome in water  
393 samples.  
394

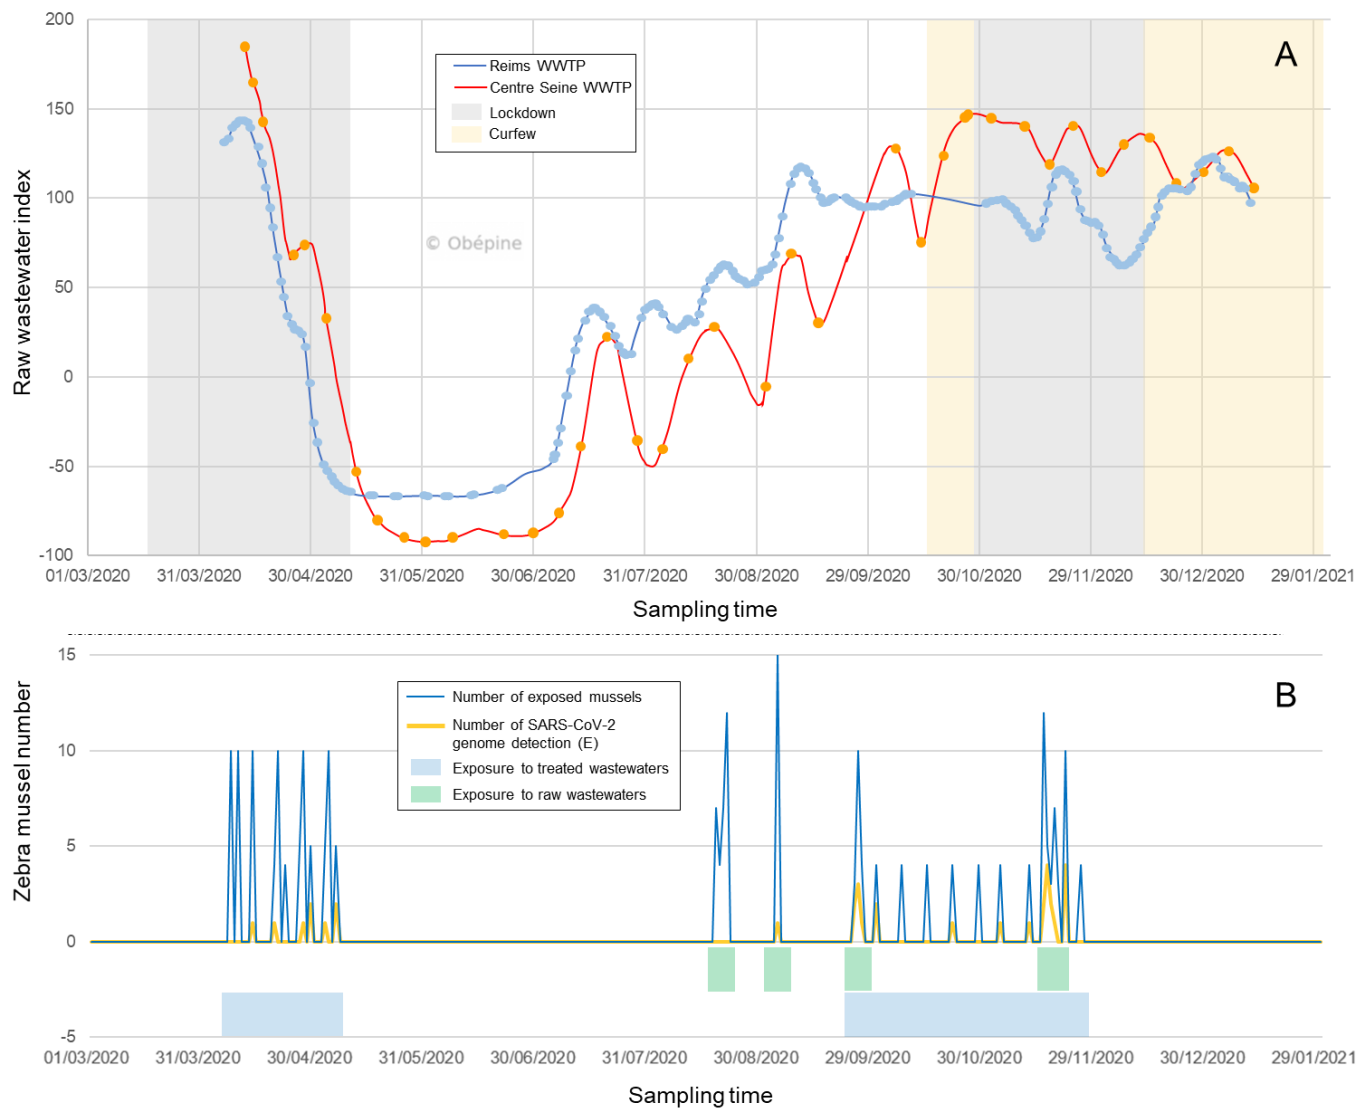

395

396 *Figure 1 : Detection of E gene of SARS-CoV-2 in raw wastewater (A) and in pool of digestive glands of zebra*  
397 *mussels (B) from the March 1<sup>st</sup> 2020 to January, 29<sup>th</sup> 2021.*

398 *A: raw wastewater index of SARS-CoV-2 genome (gene E) from Reims (blue) and center Seine WWTPs (orange),*  
399 *according to OBEPINE group. Data are represented as a trend index based on RT-qPCR quantification on the E*  
400 *gene of the SARS-CoV-2 genome and assessed with a digital model of Kalman filter type (Forward-Backward).*  
401 *Confinement and curfew periods for Reims city were indicated by different colors.*

402 *B: number of pools of digestive glands of zebra mussels exposed to raw wastewater or caged at the exit of Reims*  
403 *and center Seine WWTPs (blue curve) and number of pools with detection of at least one SARS-CoV-2 gene*  
404 *(orange curve). The periods of exposure to affluents or effluents from WWTPs are represented by rectangles of*  
405 *different colors.*

406

407 To further support the use of this sentinel species as an indicator of the presence of the SARS-  
408 CoV-2 genome in environmental waters, improvements on the extraction and detection of the  
409 SARS-CoV-2 genome in the digestive tissues of zebra mussels are required. Indeed, to  
410 improve detection of SARS-CoV-2 genome inside this complex biological matrix, the PCR  
411 cycle number has been increased to 50. Of the total positive detection data on E gene (Table  
412 4), 73% had Cq lower than 42.75, but a few were higher (all Cq were comprised between 35.64  
413 to 46.32). These high values underlined the limits of detection or extraction of this viral genetic  
414 material, and particularly in the biological matrix used here. Contrary to the quantification of  
415 SARS-CoV-2 genome in water, a pre-concentration step to concentrate the viral genome  
416 before analyses is not necessary (Kitajima et al., 2020). Moreover, the number of digestive  
417 glands per pool was not elevated (3). Several modifications can be considered to improve the  
418 viral extraction, such an addition of a purification step to limit as much as possible the  
419 enzymatic inhibitors which could be found in the biological matrix, preventing the good  
420 progress of the detection. In parallel, new experiments could be performed to improve the  
421 sensitivity of the detection of SARS-CoV-2 genome in mussels but also to characterize the  
422 bioaccumulation pattern in the tissues of *D. polymorpha*. These experiments must be  
423 performed in the laboratory in controlled conditions, to observe (or not) a dose-dependent  
424 accumulation relationship, and using untreated wastewater with higher levels of SARS-CoV-2  
425 genomes than in treated water.

426

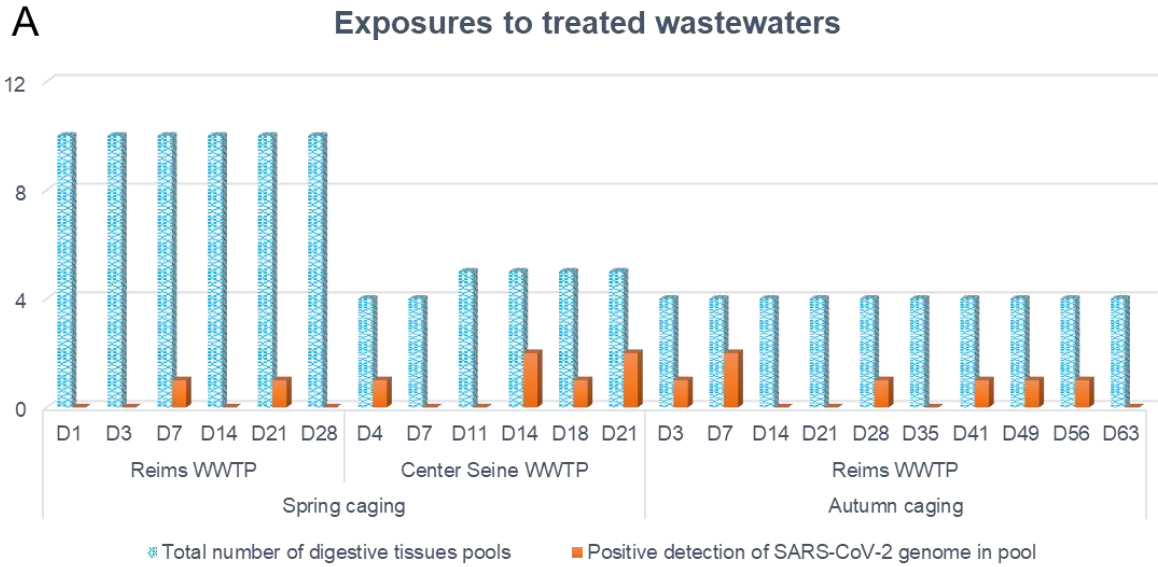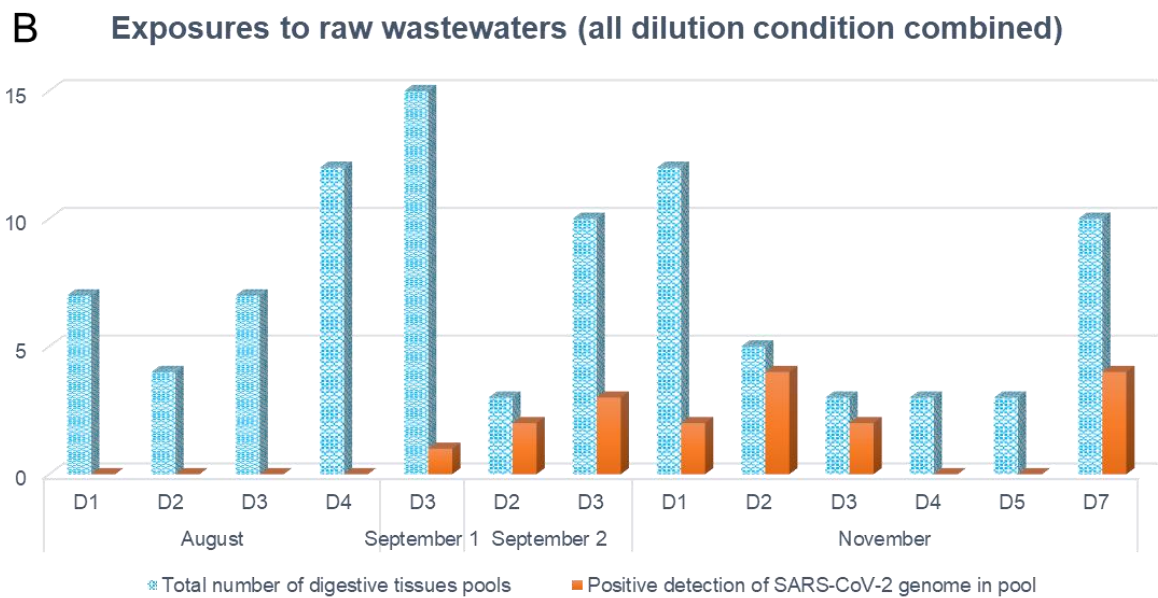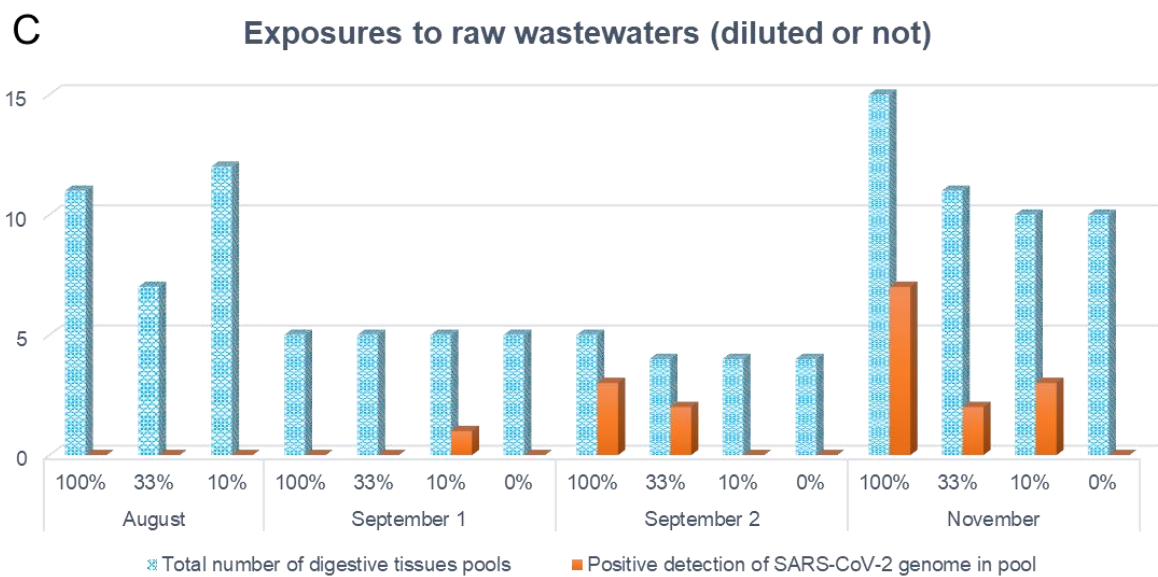

428 *Figure 2 : Total number of digestive tissues pool exposed (blue) and number of positive detection of SARS-CoV-2*  
429 *genome in pools (orange) according to exposure, exposure condition and sampling times. A: Results obtained after*  
430 *exposure to treated wastewaters (spring and autumn) on the zebra mussels caged after Reims and center Seine*  
431 *WWTPs according to sampling times. B: Results obtained after exposure to raw wastewaters (August, September*  
432 *1 and 2 and November exposures) from Reims WWTP according to sampling times (all dilution conditions*  
433 *combined). C: Results obtained after exposure to raw wastewaters (August, September 1 and 2 and November*  
434 *exposures) from Reims WWTP according to experiment and dilution conditions.*

435

### 436 3.3. Zebra mussels as biological indicators of water contamination by the SARS-CoV-2 437 genome

438 The second aim of this study was to assess the interest of using zebra mussels as bioindicator  
439 of water contamination by the SARS-CoV-2 genome. Controlled laboratory exposures were  
440 therefore put in place to address the questions raised during exposure to treated wastewater.  
441 Also, to maintain the natural contamination by SARS-CoV-2 in the receiving aquatic  
442 environment, mussels were exposed to raw wastewater from Reims WWTP.

443 Regarding the experiments performed at a laboratory scale, the genome detection of SARS-  
444 CoV-2 genome was higher when the mussels were directly submitted to raw wastewater  
445 (100%) compared to the diluted wastewaters (33 or 10%, Figure 2C). Indeed, the most  
446 concentrated condition (100% raw wastewater) resulted in a positivity of 28% of the samples  
447 (10/32), greater than 15% (4/27) and 13% (4/31), caused respectively by conditions 33% and  
448 10% of raw wastewater ratios. Zebra mussels were therefore useful to detect the SARS-CoV-  
449 2 genome in accordance with its presence in wastewaters. Furthermore, there was a similarity  
450 between the growing phase of the COVID-19 pandemic after summer 2020, confirmed by an  
451 increase of the raw wastewater index between July and October (*Figure 1A*), and the detection  
452 of the SARS-CoV-2 genome in mussels (*Figure 2B*). Indeed, when exposed to raw  
453 wastewaters in August, none of the 15 pools of exposed mussel digestive gland had the  
454 genome of this virus, and this number increased with time. During the first exposure in early  
455 September 2020, 7% (1/15) of the pools exhibited positivity for the SARS-CoV-2 genome, to  
456 increase to 38% (5/13) at the end of September, almost identical to the values found in  
457 November (33%, 12/36, *Figure 2B*). This result was in accordance with the sudden increase in  
458 the concentration of the SARS-CoV-2 genome in raw wastewater between early and late

459 September (Table 3). This increase was all the more important for the E gene and also  
460 continued after September. For illustration, the concentrations of these genes in the raw  
461 wastewater were lower than those of the 33% diluted wastewater (Table 3). This originally  
462 suggested that the zebra mussel can be used as indicator of the SARS-CoV-2 genome  
463 detection in proportion to the contamination load present in freshwater environment and  
464 contributes to emphasize the uses of zebra mussels as sentinel species for SARS-CoV-2  
465 contamination of wastewaters. Desdouits et al. (2021) and Polo et al. (2021) demonstrated the  
466 accumulation of anthropogenic virus by bivalves in several coastal sites including SARS-CoV-  
467 2 virus within digestive tissue. Contrary to Polo et al. (2021), Desdouits et al. (2021) but did  
468 not report the presence of SARS-CoV-2 genome in the field (in water or in bivalve molluscs).  
469 Nonetheless, even if the laboratory experiments allowed to expose zebra mussels to higher  
470 SARS-CoV-2 genome contamination, the experimental plan used in our study (short exposure  
471 due to the possible toxicity of raw wastewaters) only allowed the qualitative detection of the  
472 presence of SARS-CoV-2 genome in organisms but did not allow the genome quantification.  
473 Indeed, the possible toxicity of raw wastewater, causing an advanced dissection of organisms  
474 exposed to the most concentrated raw sewage conditions (18% of samples during the  
475 exposure at the end of September and 26% of samples during the last exposure, in November),  
476 did not allow mussels to be exposed any longer. To dispense with the toxicity of raw  
477 wastewater, a longer exposure of the mussels (from 14 to 21 days) in the laboratory to a non-  
478 infectious SARS-CoV-2 or to low pathogenic CoV strains could improve characterization of  
479 virus accumulation within mussels (Desdouits et al., 2021; Wurtzer et al., 2020b).

480 Thanks to our results, the use of this bivalve as a bioindicator and possible matrix to follow the  
481 presence of SARS-CoV-2 genome in water is conceivable, whether at the level of treatment  
482 plants, but also at the level of freshwater (rivers, etc.) or in countries whose water treatment  
483 structures are still underdeveloped. As announced by several recent studies, the bivalve taxon  
484 represents a complementarity, even a more than plausible alternative for the detection of  
485 viruses in the environment (Capizzi-Banas et al., 2021; Desdouits et al., 2021; La Rosa et al.,

486 2021; Polo et al., 2021). Various fields of application can therefore be envisaged, such as  
 487 environmental biomonitoring for health purposes.

488

489 *Table 4: Presence (+) or absence (-) of SARS-CoV-2 RNA in digestive glands of zebra mussels according to tested*  
 490 *genes and exposure conditions. The samples presented in this table are positive for at least one of the three genes*  
 491 *tested. E: envelope protein gene; RdRp: RNA-dependent RNA polymerase gene; N: nucleocapsid protein gene.*

| Experiment          | Date           | Exposure time | Exposure condition  | RdRp gene detection | E gene detection | N gene detection |
|---------------------|----------------|---------------|---------------------|---------------------|------------------|------------------|
| Spring caging       | April 14, 2020 | D7            | Reims WWTP          | -                   | +                | -                |
| Spring caging       | April 20, 2020 | D4            | SIAAP WWTP          | -                   | +                | -                |
| Spring caging       | April 28, 2020 | D21           | Reims WWTP          | -                   | +                | -                |
| Spring caging       | April 30, 2019 | D14           | SIAAP WWTP          | -                   | +                | -                |
| Spring caging       | April 30, 2020 | D14           | SIAAP WWTP          | -                   | +                | -                |
| Spring caging       | May 04, 2020   | D18           | SIAAP WWTP          | -                   | +                | -                |
| Spring caging       | May 07, 2020   | D21           | SIAAP WWTP          | -                   | +                | -                |
| Spring caging       | May 07, 2020   | D21           | SIAAP WWTP          | -                   | +                | -                |
| 2nd laboratory exp. | Sept. 05, 2020 | D3            | 10% raw wastewater  | -                   | +                | -                |
| 3rd laboratory exp. | Sept. 26, 2020 | D2            | 100% raw wastewater | -                   | +                | +                |
| 3rd laboratory exp. | Sept. 26, 2020 | D2            | 100% raw wastewater | -                   | +                | -                |
| 3rd laboratory exp. | Sept. 27, 2020 | D3            | 100% raw wastewater | -                   | +                | -                |
| 3rd laboratory exp. | Sept. 27, 2020 | D3            | 33% raw wastewater  | -                   | +                | +                |
| 3rd laboratory exp. | Sept. 27, 2020 | D3            | 33% raw wastewater  | -                   | +                | +                |
| Autumn caging       | Sept. 28, 2020 | D3            | Reims WWTP          | -                   | +                | +                |
| Autumn caging       | Oct. 02, 2020  | D7            | Reims WWTP          | -                   | +                | -                |
| Autumn caging       | Oct. 02, 2020  | D7            | Reims WWTP          | -                   | +                | -                |
| Autumn caging       | Oct. 23, 2020  | D28           | Reims WWTP          | -                   | +                | -                |
| Autumn caging       | Nov. 05, 2019  | D41           | Reims WWTP          | -                   | +                | -                |
| Autumn caging       | Nov. 13, 2020  | D49           | Reims WWTP          | -                   | +                | -                |
| Autumn caging       | Nov. 20, 2020  | D56           | Reims WWTP          | -                   | +                | -                |
| 4th laboratory exp. | Nov. 17, 2020  | D1            | 100% raw wastewater | -                   | +                | +                |
| 4th laboratory exp. | Nov. 17, 2020  | D1            | 33% raw wastewater  | -                   | +                | -                |
| 4th laboratory exp. | Nov. 18, 2020  | D2            | 100% raw wastewater | -                   | +                | -                |
| 4th laboratory exp. | Nov. 18, 2020  | D2            | 100% raw wastewater | -                   | +                | -                |
| 4th laboratory exp. | Nov. 18, 2020  | D2            | 100% raw wastewater | -                   | +                | -                |
| 4th laboratory exp. | Nov. 18, 2020  | D2            | 100% raw wastewater | -                   | +                | -                |
| 4th laboratory exp. | Nov. 19, 2020  | D3            | 100% raw wastewater | -                   | +                | +                |
| 4th laboratory exp. | Nov. 19, 2020  | D3            | 100% raw wastewater | -                   | +                | -                |
| 4th laboratory exp. | Nov. 23, 2020  | D7            | 33% raw wastewater  | -                   | +                | -                |
| 4th laboratory exp. | Nov. 23, 2020  | D7            | 10% raw wastewater  | -                   | +                | -                |
| 4th laboratory exp. | Nov. 23, 2020  | D7            | 10% raw wastewater  | -                   | +                | -                |
| 4th laboratory exp. | Nov. 23, 2020  | D7            | 10% raw wastewater  | -                   | +                | -                |

492

493

#### 494 4. Conclusion

495 Out of a total of 666 mussels exposed to water potentially contaminated by the SARS-CoV-2  
 496 genome, i.e. 222 pools of digestive glands, 33 pools showed positivity to the genome of this  
 497 virus, representing almost 7%. This detection was observed during the two major



498 epidemiological phases in France and both with raw wastewater and treated wastewater.  
499 Moreover, SARS-CoV-2 genomes was detected in *D. polymorpha* as well at the outlet of the  
500 Reims wastewater treatment plant as that of center Seine one. This corroborated the results  
501 in untreated wastewater but also brought a novelty with the resilience of the genetic material  
502 of the virus after treatment of these waters. This detection is proportional to the contamination  
503 in the wastewaters and can allow a temporal and spatial monitoring. The zebra mussel  
504 therefore appears to be an attractive candidate for detecting the presence of the SARS-CoV-  
505 2 genome in raw and treated wastewaters, but also in other hydrosystems. The detection of  
506 the genome of other enteric viruses could be relevant using this sentinel species.

507

## 508 **Acknowledgments**

509 The authors are deeply grateful to the MeSeine observatory from SIAAP (Ile-de-France public  
510 sanitation service) and the Obepine group for their contribution and advice to this study. This  
511 study was also supported by the ACTIA VIROcontrol Joint Technological Unit.

512

## 513 **References**

514 Amirian, E.S., 2020. Potential fecal transmission of SARS-CoV-2: Current evidence and  
515 implications for public health. *Int. J. Infect. Dis.* 95, 363–370.  
516 <https://doi.org/10.1016/j.ijid.2020.04.057>

517 Balboa, S., Mauricio-Iglesias, M., Rodriguez, S., Martínez-Lamas, L., Vasallo, F.J., Regueiro,  
518 B., Lema, J.M., 2020. The fate of SARS-CoV-2 in WWTPs points out the sludge line as a  
519 suitable spot for monitoring. *medRxiv* 2020.05.25.20112706.  
520 <https://doi.org/10.1101/2020.05.25.20112706>

521 Bervoets, L., Voets, J., Covaci, A., Chu, S., Qadah, D., Smolders, R., Schepens, P., Blust, R.,  
522 2005. Use of transplanted zebra mussels (*Dreissena polymorpha*) to assess the bioavailability  
523 of microcontaminants in Flemish surface waters. *Environ. Sci. Technol.* 39, 1492–1505.

524 Bighiu, M.A., Norman Haldén, A., Goedkoop, W., Ottoson, J., 2019. Assessing microbial  
525 contamination and antibiotic resistant bacteria using zebra mussels (*Dreissena polymorpha*).  
526 *Sci. Total Environ.* 650, 2141–2149. <https://doi.org/10.1016/j.scitotenv.2018.09.314>

527 Capizzi-Banas, S., Palos Ladeiro, M., Bastien, F., Bonnard, I., Boudaud, N., Gantzer, N.,  
528 Geffard, A., 2021. *Dreissena polymorpha* accumulate F-specific RNA bacterio-phages, which  
529 provides valuable clues about the viral pollution of rivers. *Water*.

- 530 Corman, V.M., Landt, O., Kaiser, M., Molenkamp, R., Meijer, A., Chu, D.K., Bleicker, T.,  
531 Schneider, J., Schmidt, M.L., Mulders, D.G., Haagmans, B.L., Wijsman, L., Goderski, G.,  
532 Romette, J.-L., Ellis, J., Zambon, M., Peiris, M., Goossens, H., Reusken, C., Koopmans, M.P.,  
533 Drosten, C., 2020. Detection of 2019 novel coronavirus (2019-nCoV) by real-time RT-PCR 8.
- 534 Desdouits, M., Piquet, J.-C., Wacrenier, C., Le Menec, C., Parnaudeau, S., Jousse, S., Rocq,  
535 S., Bigault, L., Contrant, M., Garry, P., Chavanon, F., Gabellec, R., Lamort, L., Lebrun, L., Le  
536 Gall, P., Meteigner, C., Schmitt, A., Seugnet, J.L., Serais, O., Peltier, C., Bressolette-Bodin,  
537 C., Blanchard, Y., Le Guyader, F.S., 2021. Can shellfish be used to monitor SARS-CoV-2 in  
538 the coastal environment? *Sci. Total Environ.* 778, 146270.  
539 <https://doi.org/10.1016/j.scitotenv.2021.146270>
- 540 Farkas, K., Hillary, L.S., Malham, S.K., McDonald, J.E., Jones, D.L., 2020. Wastewater and  
541 public health: the potential of wastewater surveillance for monitoring COVID-19. *Curr. Opin.*  
542 *Environ. Sci. Health* 17, 14–20. <https://doi.org/10.1016/j.coesh.2020.06.001>
- 543 Fuentes, C., Guix, S., Pérez-Rodríguez, F.J., Fuster, N., Carol, M., Pintó, R.M., Bosch, A.,  
544 2014. Standardized multiplex one-step qRT-PCR for hepatitis A virus, norovirus GI and GII  
545 quantification in bivalve mollusks and water. *Food Microbiol.* 40, 55–63.  
546 <https://doi.org/10.1016/j.fm.2013.12.003>
- 547 Géba, E., Aubert, D., Durand, L., Escotte, S., La Carbona, S., Cazeaux, C., Bonnard, I.,  
548 Bastien, F., Palos Ladeiro, M., Dubey, J.P., Villena, I., Geffard, A., Bigot-Clivot, A., 2020. Use  
549 of the bivalve *Dreissena polymorpha* as a biomonitoring tool to reflect the protozoan load in  
550 freshwater bodies. *Water Res.* 170, 115297. <https://doi.org/10.1016/j.watres.2019.115297>
- 551 Guerrero-Latorre, L., Ballesteros, I., Villacrés-Granda, I., Granda, M.G., Freire-Paspuel, B.,  
552 Ríos-Touma, B., 2020. SARS-CoV-2 in river water: Implications in low sanitation countries.  
553 *Sci. Total Environ.* 743, 140832. <https://doi.org/10.1016/j.scitotenv.2020.140832>
- 554 Heller, L., Mota, C.R., Greco, D.B., 2020. COVID-19 faecal-oral transmission: Are we asking  
555 the right questions? *Sci. Total Environ.* 729, 138919.  
556 <https://doi.org/10.1016/j.scitotenv.2020.138919>
- 557 Kerambrun, E., Palos Ladeiro, M., Bigot-Clivot, A., Dedourge-Geffard, O., Dupuis, E., Villena,  
558 I., Aubert, D., Geffard, A., 2016. Zebra mussel as a new tool to show evidence of freshwater  
559 contamination by waterborne *Toxoplasma gondii*. *J. Appl. Microbiol.* 120, 498–508.
- 560 Kitajima, M., Ahmed, W., Bibby, K., Carducci, A., Gerba, C.P., Hamilton, K.A., Haramoto, E.,  
561 Rose, J.B., 2020. SARS-CoV-2 in wastewater: State of the knowledge and research needs.  
562 *Sci. Total Environ.* 739, 139076. <https://doi.org/10.1016/j.scitotenv.2020.139076>
- 563 Kraak, M.H., Martin, C.T., Peeters, W.H., De Kock, W.C., 1991. Biomonitoring of heavy metals  
564 in the Western European rivers Rhine and Meuse using the freshwater mussel *Dreissena*  
565 *polymorpha*. *Environ. Pollut.* 74, 101–114.
- 566 La Rosa, G., Mancini, P., Bonanno Ferraro, G., Iaconelli, M., Veneri, C., Paradiso, R., De  
567 Medici, D., Vicenza, T., Proroga, Y.T.R., Di Maro, O., Ciccaglione, A.R., Bruni, R., Equestre,  
568 M., Taffon, S., Costantino, A., Della Rotonda, M., Suffredini, E., 2021. Hepatitis A Virus Strains  
569 Circulating in the Campania Region (2015–2018) Assessed through Bivalve Biomonitoring and  
570 Environmental Surveillance. *Viruses* 13, 16. <https://doi.org/10.3390/v13010016>
- 571 Langone, M., Petta, L., Cellamare, C.M., Ferraris, M., Guzzinati, R., Mattioli, D., Sabia, G.,  
572 2021. SARS-CoV-2 in water services: Presence and impacts. *Environ. Pollut.* 268, 115806.  
573 <https://doi.org/10.1016/j.envpol.2020.115806>



- 574 Le Guernic, A., Geffard, A., Le Foll, F., Ladeiro, M.P., 2020. Comparison of viability and  
575 phagocytic responses of hemocytes withdrawn from the bivalves *Mytilus edulis* and *Dreissena*  
576 *polymorpha*, and exposed to human parasitic protozoa. *Int. J. Parasitol.* 50, 75–83.
- 577 Le Guyader, F.S., Loisy, F., Atmar, R.L., Hutson, A.M., Estes, M.K., Ruvoën-Clouet, N.,  
578 Pommepuy, M., Le Pendu, J., 2006. Norwalk Virus-specific Binding to Oyster Digestive  
579 Tissues. *Emerg. Infect. Dis.* 12, 931–936. <https://doi.org/10.3201/eid1206.051519>
- 580 Lees, D., TAG, C.W., 2010. International standardisation of a method for detection of human  
581 pathogenic viruses in molluscan shellfish. *Food Environ. Virol.* 2, 146–155.
- 582 Lu, H., Stratton, C.W., Tang, Y.-W., 2020. Outbreak of pneumonia of unknown etiology in  
583 Wuhan, China: The mystery and the miracle. *J. Med. Virol.* 92, 401–402.  
584 <https://doi.org/10.1002/jmv.25678>
- 585 Nalla, A.K., Casto, A.M., Huang, M.-L.W., Perchetti, G.A., Sampoleo, R., Shrestha, L., Wei, Y.,  
586 Zhu, H., Jerome, K.R., Greninger, A.L., 2020. Comparative Performance of SARS-CoV-2  
587 Detection Assays Using Seven Different Primer-Probe Sets and One Assay Kit. *J. Clin.*  
588 *Microbiol.* 58. <https://doi.org/10.1128/JCM.00557-20>
- 589 Nemudryi, A., Nemudraia, A., Wiegand, T., Surya, K., Buyukyoruk, M., Vanderwood, K.K.,  
590 Wilkinson, R., Wiedenheft, B., 2020. Temporal detection and phylogenetic assessment of  
591 SARS-CoV-2 in municipal wastewater. *medRxiv* 2020.04.15.20066746.  
592 <https://doi.org/10.1101/2020.04.15.20066746>
- 593 Palos Ladeiro, M., Aubert, D., Villena, I., Geffard, A., Bigot, A., 2014. Bioaccumulation of  
594 human waterborne protozoa by zebra mussel (*Dreissena polymorpha*): interest for water  
595 biomonitoring. *Water Res.* 48, 148–155.
- 596 Palos Ladeiro, M., Bigot-Clivot, A., Geba, E., Le Foll, F., Le Guernic, A., Leprêtre, M., Geffard,  
597 A., Aubert, D., Durand, L., Villena, I., Durand, L., La Carbona, S., Favennec, L., Gargala, G.,  
598 Pierre, S., 2018. Mollusc bivalves as indicators of contamination of water bodies by protozoan  
599 parasites, in: Elias, S. (Ed.), *Reference Module in Earth Systems and Environmental Sciences*.  
600 Elsevier. <https://doi.org/10.1016/B978-0-12-409548-9.10979-0>
- 601 Peng, L., Liu, J., Xu, W., Luo, Q., Chen, D., Lei, Z., Huang, Z., Li, X., Deng, K., Lin, B., Gao,  
602 Z., 2020. SARS-CoV-2 can be detected in urine, blood, anal swabs, and oropharyngeal swabs  
603 specimens. *J. Med. Virol.* 92, 1676–1680. <https://doi.org/10.1002/jmv.25936>
- 604 Polo, D., Lois, M., Fernández-Núñez, M.T., Romalde, J.L., 2021. Detection of SARS-CoV-2  
605 RNA in bivalve mollusks and marine sediments. *Sci. Total Environ.* 786, 147534.  
606 <https://doi.org/10.1016/j.scitotenv.2021.147534>
- 607 Randazzo, W., Truchado, P., Cuevas-Ferrando, E., Simón, P., Allende, A., Sánchez, G., 2020.  
608 SARS-CoV-2 RNA in wastewater anticipated COVID-19 occurrence in a low prevalence area.  
609 *Water Res.* 181, 115942. <https://doi.org/10.1016/j.watres.2020.115942>
- 610 Ren, S.-Y., Wang, W.-B., Hao, Y.-G., Zhang, H.-R., Wang, Z.-C., Chen, Y.-L., Gao, R.-D.,  
611 2020. Stability and infectivity of coronaviruses in inanimate environments. *World J. Clin. Cases*  
612 8, 1391–1399. <https://doi.org/10.12998/wjcc.v8.i8.1391>
- 613 Réseau OBEPINE, 2021. Rapport d'analyse STEP Reims. Réseau OBEPINE. URL  
614 <https://www.reseau-obepine.fr/reims/> (accessed 1.27.21).
- 615 Rimoldi, S.G., Stefani, F., Gigantiello, A., Polesello, S., Comandatore, F., Mileto, D., Maresca,  
616 M., Longobardi, C., Mancon, A., Romeri, F., Pagani, C., Cappelli, F., Roscioli, C., Moja, L.,

- 617 Gismondo, M.R., Salerno, F., 2020. Presence and infectivity of SARS-CoV-2 virus in  
618 wastewaters and rivers. *Sci. Total Environ.* 744, 140911.  
619 <https://doi.org/10.1016/j.scitotenv.2020.140911>
- 620 Shirato, K., Nao, N., Katano, H., Takayama, I., Saito, S., Kato, F., Katoh, H., Sakata, M.,  
621 Nakatsu, Y., Mori, Y., Kageyama, T., Matsuyama, S., Takeda, M., 2020. Development of  
622 Genetic Diagnostic Methods for Detection for Novel Coronavirus 2019(nCoV-2019) in Japan.  
623 *Jpn. J. Infect. Dis.* 73, 304–307. <https://doi.org/10.7883/yoken.JJID.2020.061>
- 624 Singer, A., Wray, R., 2020. Detection and Survival of SARS-coronavirus in Human Stool, Urine,  
625 Wastewater and Sludge. <https://doi.org/10.20944/preprints202006.0216.v2>
- 626 Stumpf, P., Failing, K., Papp, T., Nazir, J., Böhm, R., Marschang, R.E., 2010. Accumulation of  
627 a Low Pathogenic Avian Influenza Virus in Zebra Mussels (*Dreissena polymorpha*). *Avian Dis.*  
628 54, 1183–1190. <https://doi.org/10.1637/9162-111709-Reg.1>
- 629 Suffredini, E., Le, Q.H., Di Pasquale, S., Pham, T.D., Vicenza, T., Losardo, M., To, K.A., De  
630 Medici, D., 2020. Occurrence and molecular characterization of enteric viruses in bivalve  
631 shellfish marketed in Vietnam. *Food Control* 108, 106828.  
632 <https://doi.org/10.1016/j.foodcont.2019.106828>
- 633 U.S. Department of Health and Human Services, 2020. 2019-Novel Coronavirus (2019-nCoV)  
634 Real-time rRT-PCR Panel Primers and Probes.
- 635 Wang, J., Feng, H., Zhang, S., Ni, Z., Ni, L., Chen, Y., Zhuo, L., Zhong, Z., Qu, T., 2020. SARS-  
636 CoV-2 RNA detection of hospital isolation wards hygiene monitoring during the Coronavirus  
637 Disease 2019 outbreak in a Chinese hospital. *Int. J. Infect. Dis.* 94, 103–106.  
638 <https://doi.org/10.1016/j.ijid.2020.04.024>
- 639 Westhaus, S., Weber, F.-A., Schiwy, S., Linnemann, V., Brinkmann, M., Widera, M., Greve,  
640 C., Janke, A., Hollert, H., Wintgens, T., Ciesek, S., 2021. Detection of SARS-CoV-2 in raw and  
641 treated wastewater in Germany – Suitability for COVID-19 surveillance and potential  
642 transmission risks. *Sci. Total Environ.* 751, 141750.  
643 <https://doi.org/10.1016/j.scitotenv.2020.141750>
- 644 WHO, 2020a. Pneumonia of unknown cause – China [WWW Document]. WHO. URL  
645 <http://www.who.int/csr/don/05-january-2020-pneumonia-of-unknown-cause-china/en/>  
646 (accessed 1.13.21).
- 647 WHO, 2020b. Protocol: Real-time RT-PCR assays for the detection of SARS-CoV-2.  
648 Institut Pasteur, Paris.
- 649 Wiesner, L., Günther, B., Fenske, C., 2001. Temporal and spatial variability in the heavy-metal  
650 content of *Dreissena polymorpha* (Pallas) (Mollusca: Bivalvia) from the Kleines Haff  
651 (northeastern Germany). *Hydrobiologia* 443, 137–145.  
652 <https://doi.org/10.1023/A:1017508523148>
- 653 Wurtzer, S., Marechal, V., Mouchel, J.M., Maday, Y., Teyssou, R., Richard, E., Almayrac, J.L.,  
654 Moulin, L., 2020a. Evaluation of lockdown effect on SARS-CoV-2 dynamics through viral  
655 genome quantification in waste water, Greater Paris, France, 5 March to 23 April 2020.  
656 *Eurosurveillance* 25, 2000776. <https://doi.org/10.2807/1560-7917.ES.2020.25.50.2000776>
- 657 Wurtzer, S., Marechal, V., Mouchel, J.M., Moulin, L., 2020b. Time course quantitative detection  
658 of SARS-CoV-2 in Parisian wastewaters correlates with COVID-19 confirmed cases. Pre-Print  
659 4.

660 Wurtzer, S., Waldman, P., Ferrier-Rembert, A., Frenois-Veyrat, G., Mouchel, J.M., Boni, M.,  
661 Maday, Y., Marechal, V., Moulin, L., 2021. Several forms of SARS-CoV-2 RNA can be detected  
662 in wastewaters: implication for wastewater-based epidemiology and risk assessment. *Water*  
663 *Res.* 117183. <https://doi.org/10.1016/j.watres.2021.117183>

664 Yang, X., Yu, Y., Xu, J., Shu, H., Xia, J., Liu, H., Wu, Y., Zhang, L., Yu, Z., Fang, M., Yu, T.,  
665 Wang, Y., Pan, S., Zou, X., Yuan, S., Shang, Y., 2020. Clinical course and outcomes of  
666 critically ill patients with SARS-CoV-2 pneumonia in Wuhan, China: a single-centered,  
667 retrospective, observational study. *Lancet Respir. Med.* 8, 475–481.  
668 [https://doi.org/10.1016/S2213-2600\(20\)30079-5](https://doi.org/10.1016/S2213-2600(20)30079-5)

669 Zhang, Y., Cen, M., Hu, M., Du, L., Hu, W., Kim, J.J., Dai, N., 2021. Prevalence and Persistent  
670 Shedding of Fecal SARS-CoV-2 RNA in Patients With COVID-19 Infection: A Systematic  
671 Review and Meta-analysis. *Clin. Transl. Gastroenterol.* 12.  
672 <https://doi.org/10.14309/ctg.0000000000000343>

673
